# Supplementary material for: Elastoplastic behavior of anisotropic, physically crosslinked hydrogel networks comprising stiff, charged fibrils in an electrolyte
Source: Royal Society of Chemistry journal article supplement (doi:10.1039/d2sm01571d), 2023-01-01
Supplement: d2sm01571d1.pdf [file d2sm01571d1.pdf]

## Supporting information

# Elastoplastic behavior of anisotropic, physically crosslinked hydrogel networks comprising stiff, charged fibrils in an electrolyte

*Rebecca Östmans,<sup>1, 2, +</sup> Maria F. Cortes Ruiz,<sup>1, 2, +</sup> Jowan Rostami,<sup>1</sup> Farhiya Alex Sellman,<sup>1, 2</sup> Lars Wågberg,<sup>1, 2</sup> Stefan B. Lindström<sup>3</sup> and Tobias Bensefelt,<sup>1, 4, \*</sup>*

<sup>1</sup> Department of Fibre and Polymer Technology, Division of Fibre Technology, KTH Royal Institute of Technology, 100 44 Stockholm, Sweden.

<sup>2</sup> Wallenberg Wood Science Center, 100 44 Stockholm, Sweden

<sup>3</sup> FSCN Research Center, Mid Sweden University, 851 70 Sundsvall, Sweden

<sup>4</sup> School of Materials Science and Engineering, Nanyang Technological University, 639798 Singapore

<sup>+</sup> These authors contributed equally to this work

<sup>\*</sup> Correspondence to: [bense@kth.se](mailto:bense@kth.se) or [gustaftobias.b@ntu.edu.sg](mailto:gustaftobias.b@ntu.edu.sg)

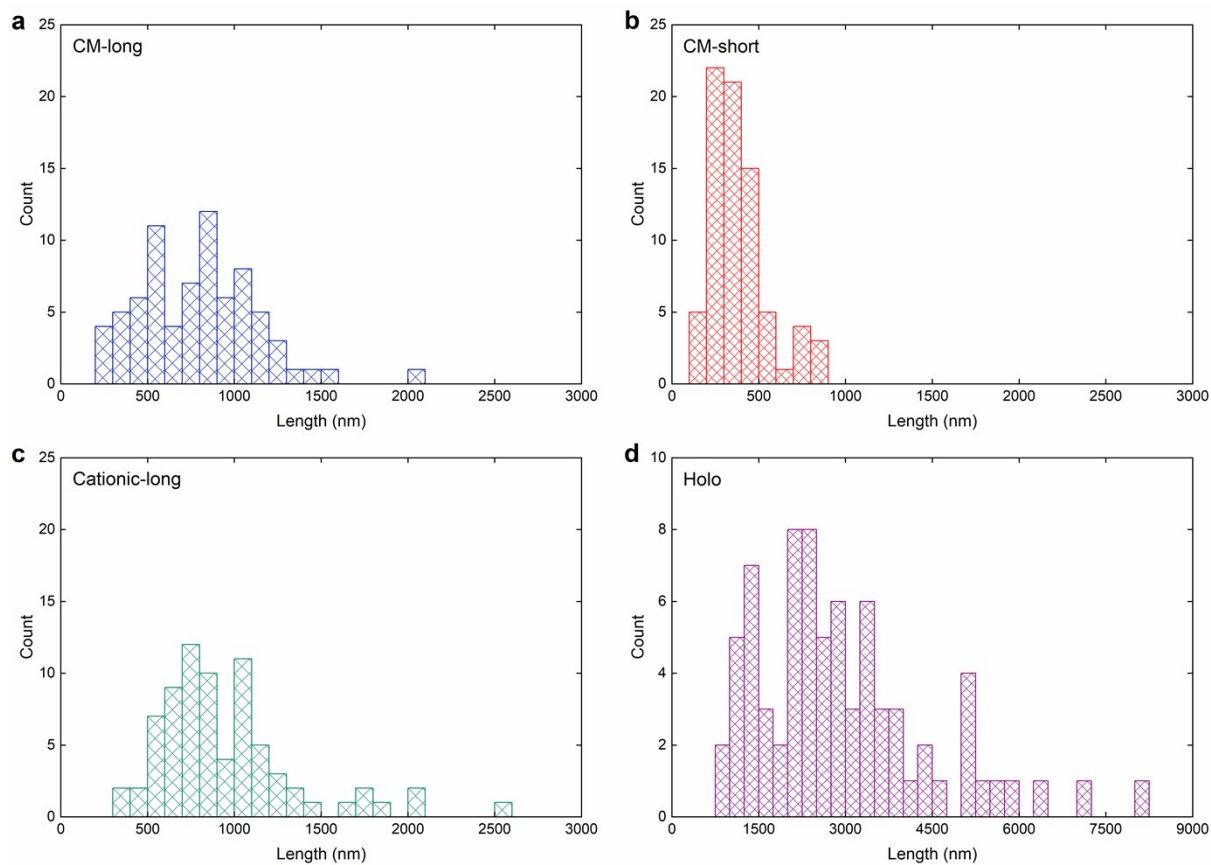

**Fig. S1.** Length distribution for a) CM-long, b) CM-short, c) Cat-long, and d) Holo CNFs.

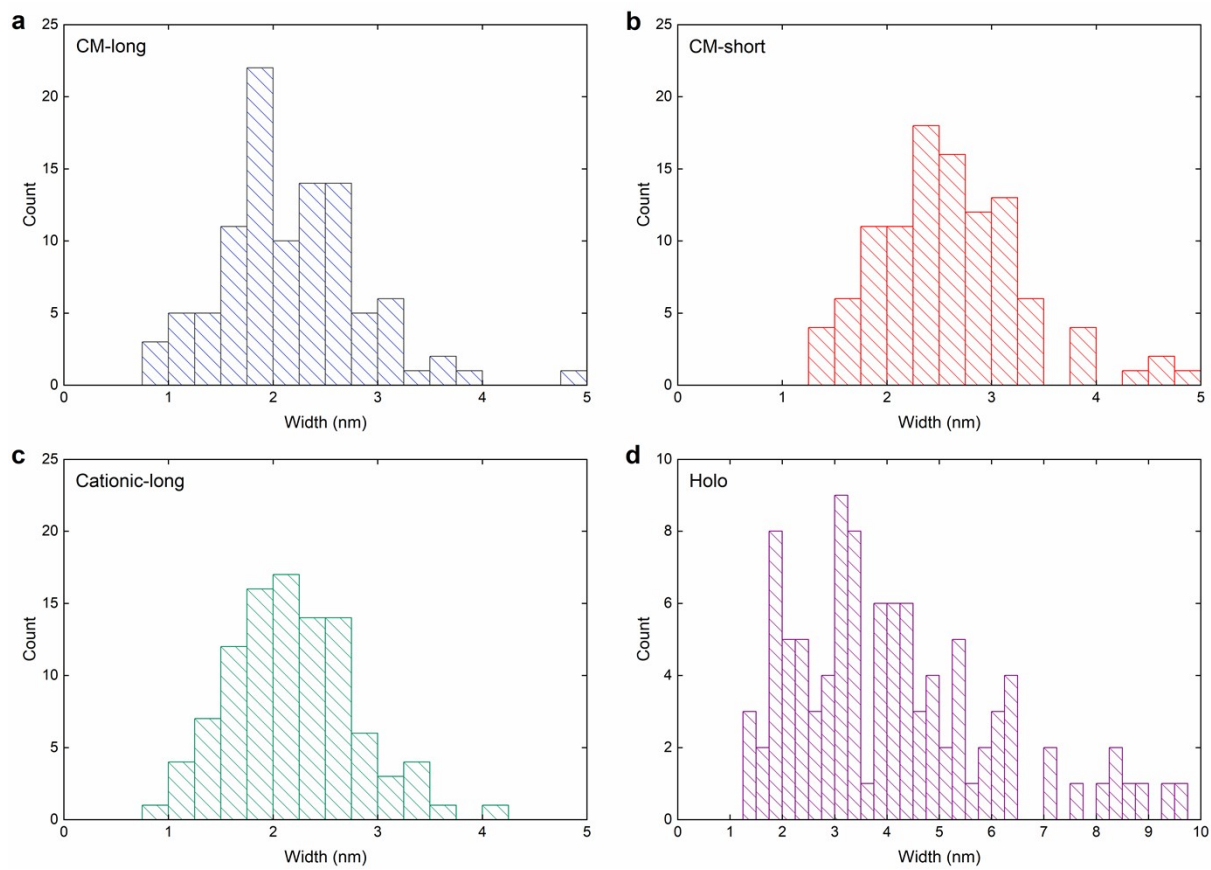

**Fig. S2.** Width distribution for a) CM-long, b) CM-short, c) Cat-long, and d) Holo CNFs.

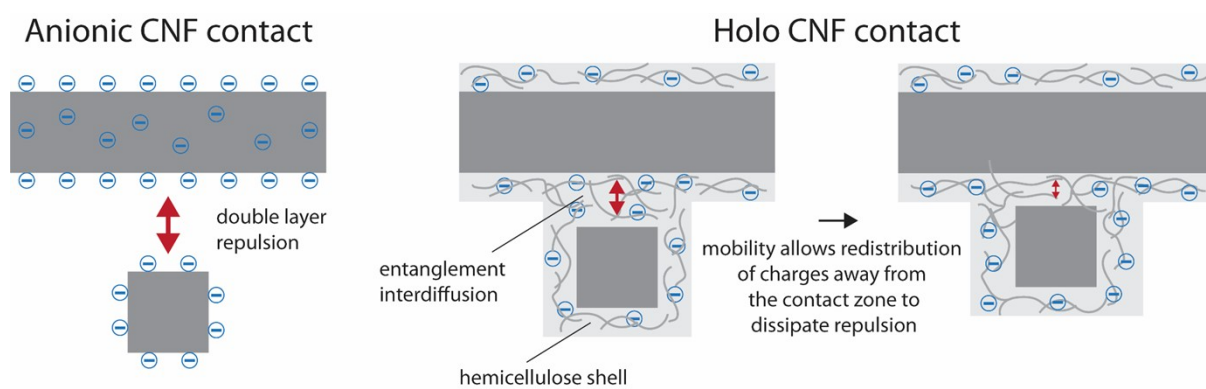

**Fig. S3.** Hypothetical mechanism for Holo-CNF interfaces by entanglement, interdiffusion, and redistribution of charges to dissipate repulsion.

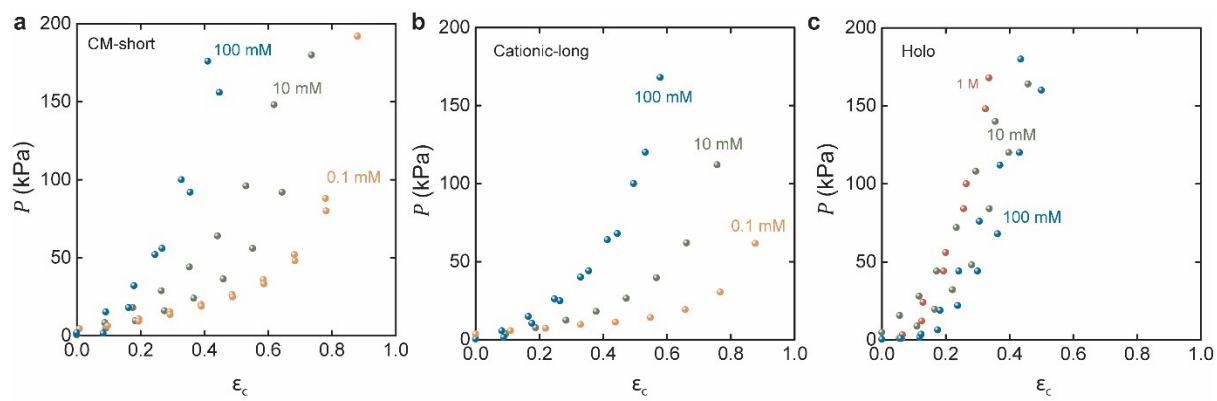

**Fig. S4.** Plate pressure ( $P$ ) as a function of compressive strain for a) CM-short, b) Cat-long, and c) Holo CNFs.

**Table S1.** Steps and relaxation time during compression measurements.

| <b>STEP</b> | <b>COMPRESSION<br/>RATE (<math>\mu\text{m/s}</math>)</b> | <b>RELAXATION<br/>TIME (min)</b> |
|-------------|----------------------------------------------------------|----------------------------------|
| <b>1</b>    | 0.3                                                      | 20                               |
| <b>2</b>    | 0.3                                                      | 20                               |
| <b>3</b>    | 0.3                                                      | 20                               |
| <b>4</b>    | 0.3                                                      | 20                               |
| <b>5</b>    | 0.2                                                      | 20                               |
| <b>6</b>    | 0.2                                                      | 20                               |
| <b>7</b>    | 0.2                                                      | 40                               |
| <b>8</b>    | 0.1                                                      | 40                               |
| <b>9</b>    | 0.1                                                      | 60                               |
| <b>10</b>   | 0.1                                                      | 60                               |
